# Supplementary material for: The magnitude and mechanisms of the weekend effect in hospital admissions: A protocol for a mixed methods review incorporating a systematic review and framework synthesis
Source: Springer Nature journal article supplement (doi:10.1186/s13643-016-0260-2), 2016-05-21
Supplement: MOESM2 [file 10188626]

# The magnitude and mechanisms of the weekend effect in hospital admissions: A protocol for a mixed method review incorporating a systematic review and framework synthesis

## The HiSLAC Collaboration

### Appendices

#### Appendix 1 Search strategy for MEDLINE

1. MEDLINE; weeken\*.ti,ab; 5300 results.
2. MEDLINE; "week en\*" .ti,ab; 956 results.
3. MEDLINE; "out of hour\*" .ti,ab; 1378 results.
4. MEDLINE; exp AFTER-HOURS CARE/; 1118 results.
5. MEDLINE; "after hours" .ti,ab; 883 results.
6. MEDLINE; weekday\* .ti,ab; 2909 results.
7. MEDLINE; "week day\*" .ti,ab; 315 results.
8. MEDLINE; exp PATIENT ADMISSION/; 19058 results.
9. MEDLINE; exp HOSPITALIZATION/; 165683 results.
10. MEDLINE; exp PATIENT DISCHARGE/; 19783 results.
11. MEDLINE; exp EMERGENCY SERVICE, HOSPITAL/; 51511 results.
12. MEDLINE; exp EMERGENCY MEDICAL SERVICES/; 98612 results.
13. MEDLINE; admission\* .ti,ab; 144697 results.
14. MEDLINE; discharge\* .ti,ab; 174549 results.
15. MEDLINE; exp SECONDARY CARE/; 143 results.
16. MEDLINE; "secondary care" .ti,ab; 3640 results.
17. MEDLINE; hospital\* .ti,ab; 871513 results.
18. MEDLINE; 1 OR 2 OR 3 OR 4 OR 5 OR 6 OR 7; 10395 results.
19. MEDLINE; 8 OR 9 OR 10 OR 11 OR 12 OR 13 OR 14 OR 15 OR 16 OR 17; 1135206 results.
20. MEDLINE; 18 AND 19; 3211 results.
21. MEDLINE; 20 [Limit to: Humans and Publication Year 2000-2015]; 2173 results

## Appendix 2 Study screening form

### HiSLAC Literature Review 2<sup>nd</sup> Round Screening Form

#### Instructions

Records that have passed the 1<sup>st</sup> round of screening were considered potentially relevant to weekend effects. These have been broadly grouped into four types of studies (1)-(4) as shown in Figure below. The main purpose for this (2<sup>nd</sup>) round of screening is to make a near-final\* judgement on the eligibility of each paper according to the updated inclusion/exclusion criteria and to assign each record to one of the relevant destinations within the literature review: systematic review (SR), systematic review appendix (SRAX), framework synthesis (FS), framework synthesis appendix (FSAX) or exclude (EX) based on the coding scheme shown below and overleaf.

\*The final decision could still change upon examination of full-texts or subsequent adjustment of inclusion criteria for framework synthesis (which is meant to be an iterative process with some flexibility regarding the literature to be consulted and included)

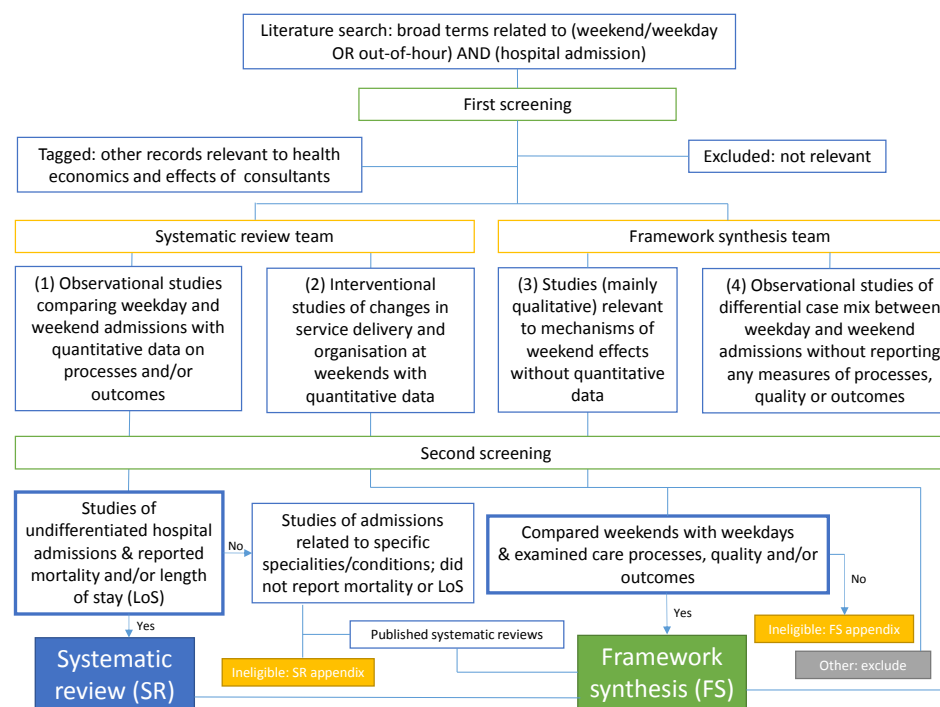

**Systematic review team – further coding of type (1) studies from 1<sup>st</sup> screening**

| Criteria                                         | Details and examples                                                                                                                                                                                                                                                                                                                                                                  | Action and coding for '2 <sup>nd</sup> screening'                                                                                      |
|--------------------------------------------------|---------------------------------------------------------------------------------------------------------------------------------------------------------------------------------------------------------------------------------------------------------------------------------------------------------------------------------------------------------------------------------------|----------------------------------------------------------------------------------------------------------------------------------------|
| <b>1. Absence of other reasons for exclusion</b> | Note: this item is mainly to eliminate less relevant records that were retained from the 1 <sup>st</sup> screening due to insufficient information or 'just in case'                                                                                                                                                                                                                  |                                                                                                                                        |
| Yes                                              |                                                                                                                                                                                                                                                                                                                                                                                       | Proceed to criterion 2                                                                                                                 |
| No                                               | Examples of studies to be excluded<br><b>Comparison:</b> did not compare weekends with weekdays; only compared night time with day night<br><b>Study design:</b> narrative review, commentary, editorial, letters without presenting original data<br><b>Setting:</b> long-term care facilities, primary care, primary care out-of-hour services, community services, dental services | Exclude;<br>Code <b>EX</b> for exclusion or <b>BK</b> if it could be very useful background information; provide comments as needed    |
| <b>2. Undifferentiated admissions</b>            |                                                                                                                                                                                                                                                                                                                                                                                       |                                                                                                                                        |
| Yes                                              | All admissions; all medical admissions; all surgical admissions; all emergency admissions; all elective admissions; all adult admissions; all paediatric admissions                                                                                                                                                                                                                   | Proceed to criterion 3                                                                                                                 |
| No                                               | Admissions for specific diagnostic groups, conditions or specialities; specialist hospitals or units, e.g. maternity hospitals, mental health hospitals, intensive care unit (ICU), stroke centre, trauma centre, cancer unit; patients of selected age groups<br><br><b>Further action</b><br>Systematic reviews of selected admissions listed above                                 | Tag for systematic review appendix – exclude due to Selected admissions<br>Code <b>SRAX_S</b><br><br>Refer to framework synthesis team |
| <b>3. Reported outcome of interest</b>           |                                                                                                                                                                                                                                                                                                                                                                                       |                                                                                                                                        |
| Yes                                              | Mortality; length of stay                                                                                                                                                                                                                                                                                                                                                             | Include in systematic review<br>Code <b>SR</b>                                                                                         |
| No                                               | Only reported outcomes other than mortality and length of stay (e.g. only reported measures of clinical processes)<br><br><b>Further action</b><br>Studies that reported information on costs                                                                                                                                                                                         | Tag for systematic review appendix – exclude due to Outcomes<br>Code <b>SRAX_O</b><br><br>Refer to health economics team               |

**Framework synthesis team – further coding of type (2) & (3) studies from 1<sup>st</sup> screening**

| Criteria                                                 | Details and examples                                                                                                                                                                                                                                                                                                                          | Action and coding for '2 <sup>nd</sup> screening'                                                                                      |
|----------------------------------------------------------|-----------------------------------------------------------------------------------------------------------------------------------------------------------------------------------------------------------------------------------------------------------------------------------------------------------------------------------------------|----------------------------------------------------------------------------------------------------------------------------------------|
| <b>1. Absence of other reasons for exclusion</b>         | Note: this item is mainly to eliminate less relevant records that were retained from the 1 <sup>st</sup> screening due to insufficient information or 'just in case'                                                                                                                                                                          |                                                                                                                                        |
| Yes                                                      |                                                                                                                                                                                                                                                                                                                                               | Proceed to criterion 2                                                                                                                 |
| No                                                       | Examples of studies to be excluded<br><b>Comparison:</b> only compared night time with day night<br><b>Study design:</b> narrative review, commentary, editorial, letters without presenting original data<br><b>Setting:</b> long-term care facilities, primary care, primary care out-of-hour services, community services, dental services | Exclude;<br>Code <b>EX</b> for exclusion or <b>BK</b> if it could be very useful background information;<br>provide comments as needed |
| <b>2. Compared weekends with weekdays</b>                |                                                                                                                                                                                                                                                                                                                                               |                                                                                                                                        |
| Yes                                                      |                                                                                                                                                                                                                                                                                                                                               | Proceed to criterion 3                                                                                                                 |
| No                                                       | Examples<br>Studies that looked at care quality, outcomes or experience at weekends without comparing them to weekdays                                                                                                                                                                                                                        | Tag for framework synthesis appendix – exclude due to lack of Comparison<br>Code <b>FSAX_C</b>                                         |
| <b>3. Described care quality or outcomes of interest</b> |                                                                                                                                                                                                                                                                                                                                               |                                                                                                                                        |
| Yes                                                      | Studies that described care quality (as defined by study author; including errors) and/or outcomes (including adverse events, staff, carer and patient experiences, quality of life)                                                                                                                                                          | Include in framework synthesis<br>Code <b>FS</b>                                                                                       |
| No                                                       | Examples<br>Studies that only described service provision/ utilization pattern without having also examined care quality or outcomes; e.g. described differences in bed usage or staff/service availability between weekdays and weekends without exploring its impact on care quality and/or outcomes                                        | Tag for framework synthesis appendix – exclude due to lack of Outcomes<br>Code <b>FSAX_O</b>                                           |
